# Supplementary material for: Label-Free Luminescent Mesoporous Silica Nanoparticles for Imaging and Drug Delivery
Source: PubMed Central journal article supplement — Theranostics. 2013 Aug 10;3(9):650–7. doi: 10.7150/thno.6668 (PMC3776216; doi:10.7150/thno.6668), 2013-08-10
Supplement: thnov03p0650s1.pdf [file thnov03p0650s1.pdf]

## Supplementary Material

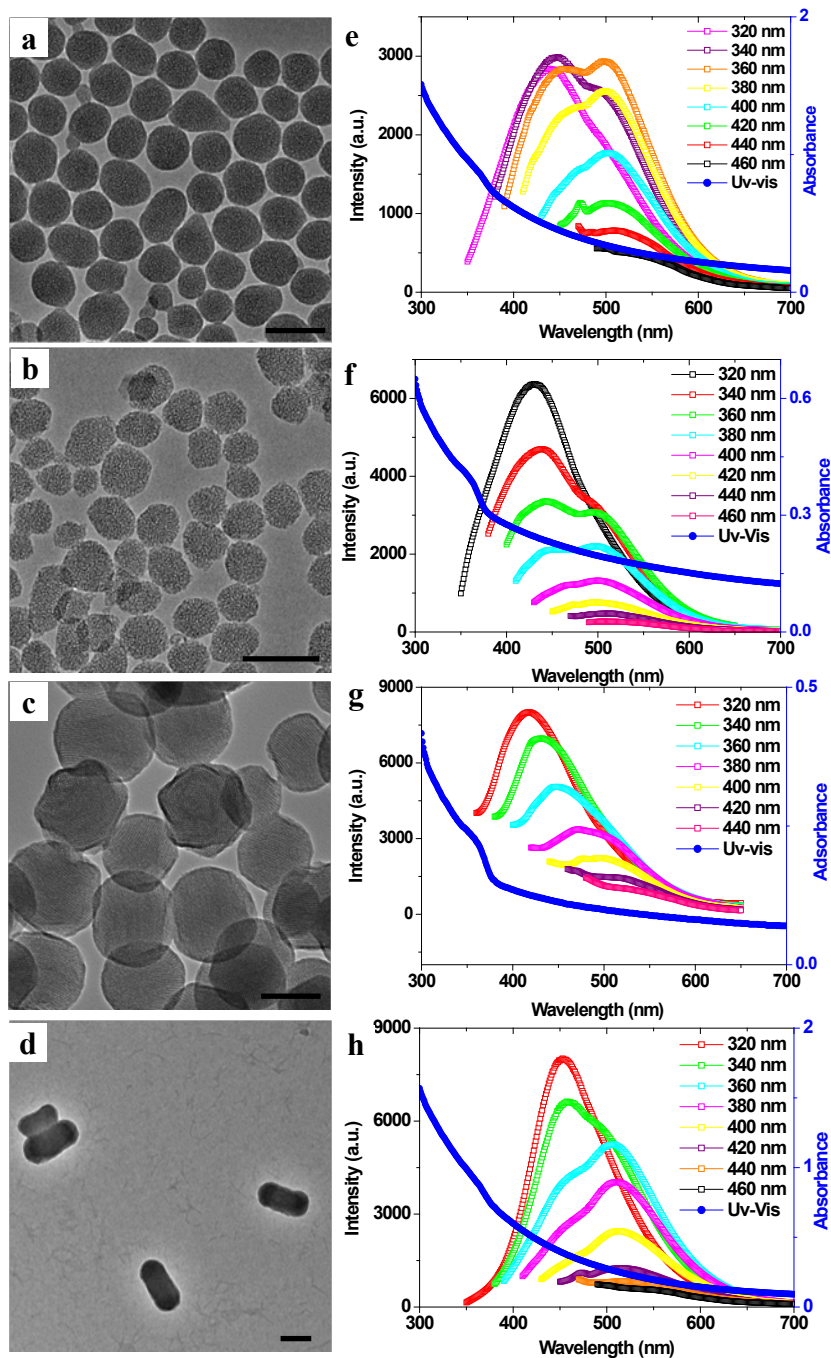

**Figure S1.** TEM images of a) 80 nm, b) 60 nm, c) 150 nm spherical mesoporous silica nanoparticles, and d) silica nanorods after calcination. Scale bars: 100 nm. e-h) Fluorescence emission spectra of particles a-d. 3-mercaptopropyltrimethoxysilane was used in c&d as the defect-generating organosilane.

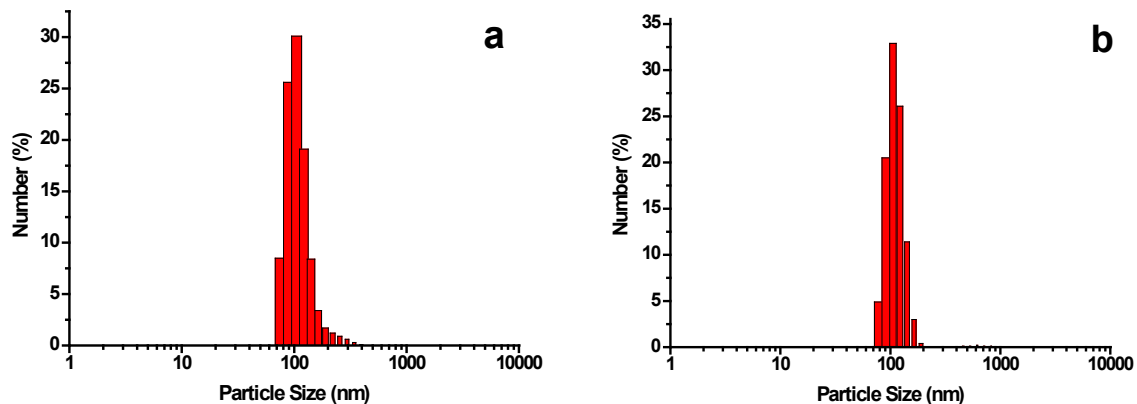

**Figure S2.** Dynamic light scattering study results of a) NH<sub>2</sub>-FL-SiO<sub>2</sub> and b) RGD-FL-SiO<sub>2</sub> nanoparticles. The average hydrodynamic sizes were 114 and 120 nm, respectively.

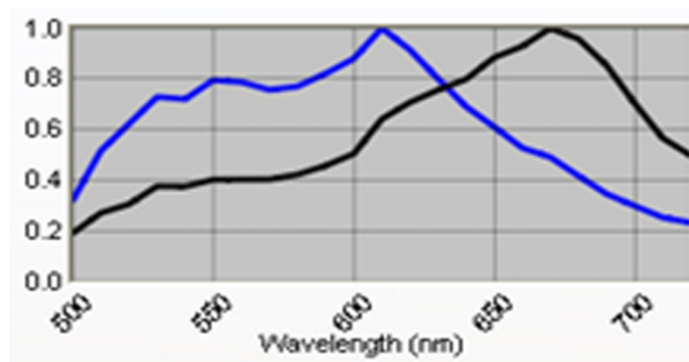

**Figure S3.** Emission spectra analysis on tumor (blue curve) and intestine (black curve) from *ex vivo* imaging studies (**Figure 3a**).

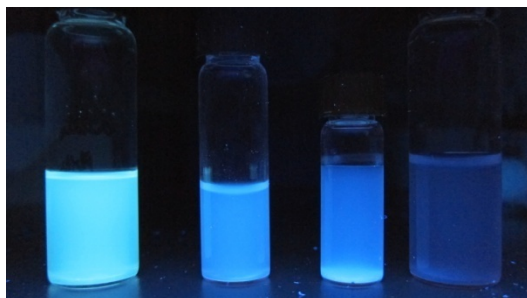

**Figure S4.** From left to right, silica nanoparticles functionalized by TSD (solid silica, calcined at 400°C), APTES (solid silica, calcined at 400°C), APTES (mesoporous silica, calcined at 210 °C), and untreated silica nanoparticles. Excited by 365 nm UV light.

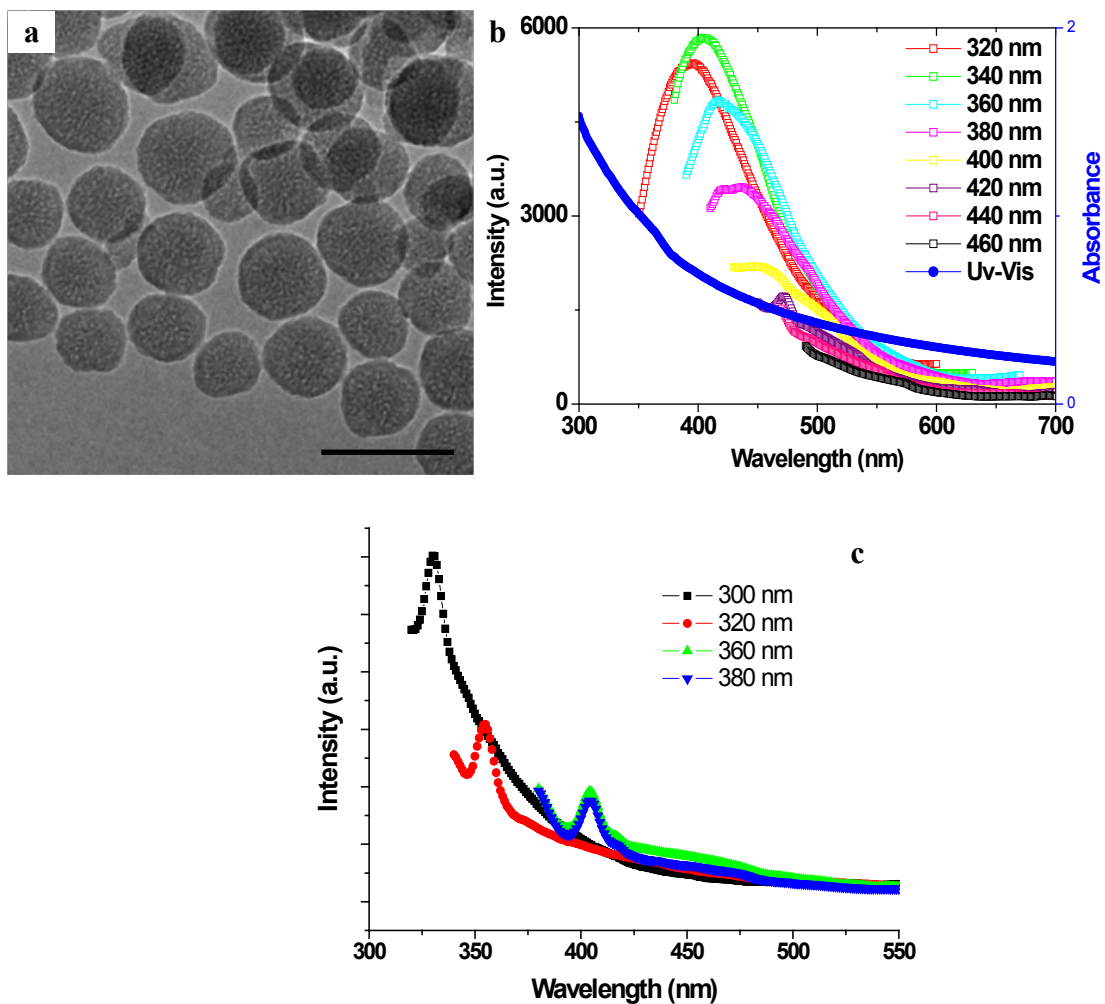

**Figure S5.** a) TEM image of mesoporous SiO<sub>2</sub> nanoparticles after calcination at 210 °C. Scale bar, 100 nm. b) Fluorescence and UV-Vis spectra of particles in a. c) Fluorescence spectra of mesoporous SiO<sub>2</sub> nanoparticles after calcination at 600 °C.
